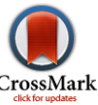

# Interspinous Spacer versus Traditional Decompressive Surgery for Lumbar Spinal Stenosis: A Systematic Review and Meta-Analysis

Ai-Min Wu<sup>1</sup>, Yong Zhou<sup>2</sup>, Qing-Long Li<sup>1</sup>, Xin-Lei Wu<sup>3</sup>, Yong-Long Jin<sup>1</sup>, Peng Luo<sup>1</sup>, Yong-Long Chi<sup>1</sup>, Xiang-Yang Wang<sup>1\*</sup>

**1** The Department of Spinal Surgery, Second Affiliated Hospital of Wenzhou Medical University, Zhejiang Spinal Research Center, Wenzhou, Zhejiang, People's Republic of China, **2** The First Medical College, Wenzhou Medical University, Wenzhou, Zhejiang, People's Republic of China, **3** Institute of Digitized Medicine, Wenzhou Medical University, Wenzhou, Zhejiang, People's Republic of China

## Abstract

**Background:** Dynamic interspinous spacers, such as X-stop, Coflex, DIAM, and Aperius, are widely used for the treatment of lumbar spinal stenosis. However, controversy remains as to whether dynamic interspinous spacer use is superior to traditional decompressive surgery.

**Methods:** Medline, Embase, Cochrane Library, and the Cochrane Controlled Trials Register were searched during August 2013. A track search was performed on February 27, 2014. Study was included in this review if it was: (1) a randomized controlled trial (RCT) or non-randomized prospective comparison study, (2) comparing the clinical outcomes for interspinous spacer use versus traditional decompressive surgery, (3) in a minimum of 30 patients, (4) with a follow-up duration of at least 12 months.

**Results:** Two RCTs and three non-randomized prospective studies were included, with 204 patients in the interspinous spacer (IS) group and 217 patients in the traditional decompressive surgery (TDS) group. Pooled analysis showed no significant difference between the IS and TDS groups for low back pain (WMD: 1.2; 95% CI: -10.12, 12.53;  $P = 0.03$ ;  $I^2 = 66\%$ ), leg pain (WMD: 7.12; 95% CI: -3.88, 18.12;  $P = 0.02$ ;  $I^2 = 70\%$ ), ODI (WMD: 6.88; 95% CI: -14.92, 28.68;  $P = 0.03$ ;  $I^2 = 79\%$ ), RDQ (WMD: -1.30, 95% CI: -3.07, 0.47;  $P = 0.00$ ;  $I^2 = 0\%$ ), or complications (RR: 1.39; 95% CI: 0.61, 3.14;  $P = 0.23$ ;  $I^2 = 28\%$ ). The TDS group had a significantly lower incidence of reoperation (RR: 3.34; 95% CI: 1.77, 6.31;  $P = 0.60$ ;  $I^2 = 0\%$ ).

**Conclusion:** Although patients may obtain some benefits from interspinous spacers implanted through a minimally invasive technique, interspinous spacer use is associated with a higher incidence of reoperation and higher cost. The indications, risks, and benefits of using an interspinous process device should be carefully considered before surgery.

**Citation:** Wu A-M, Zhou Y, Li Q-L, Wu X-L, Jin Y-L, et al. (2014) Interspinous Spacer versus Traditional Decompressive Surgery for Lumbar Spinal Stenosis: A Systematic Review and Meta-Analysis. PLoS ONE 9(5): e97142. doi:10.1371/journal.pone.0097142

**Editor:** Michael Fehlings, University of Toronto, Canada

**Received:** January 21, 2014; **Accepted:** April 15, 2014; **Published:** May 8, 2014

**Copyright:** © 2014 Wu et al. This is an open-access article distributed under the terms of the Creative Commons Attribution License, which permits unrestricted use, distribution, and reproduction in any medium, provided the original author and source are credited.

**Funding:** This work was supported by the National Natural Sciences Foundation of China (81372014; 81371988) and the Natural Sciences Foundation of Zhejiang Province for Distinguished Young Scholars (LR12H06001). The funders had no role in the study design, data collection and analysis, decision to publish, or preparation of the manuscript.

**Competing Interests:** The authors have declared that no competing interests exist.

\* E-mail: knightman@yeah.net

## Introduction

Degenerative lumbar spinal stenosis is common in the elderly population, and many affected individuals have pain and neurogenic intermittent claudication. Decompressive surgery is recommended for their treatment [1,2]. Flexion tends to relieve symptoms for some patients. Therefore, dynamic devices have been designed to limit spinal extension. These devices include interspinous spacers, such as the X-stop, Coflex, DIAM, and Aperius devices [3,4,5].

However, controversy remains about whether interspinous spacers produce better or worse outcomes than traditional decompressive surgery [6,7]. Richards et al. reported that implanted interspinous spacers could increase the spinal canal area, as well as the width and area of the intervertebral foramen

[8]. Zucherman et al. [9] reported good functional improvement and pain relief after the implantation of interspinous spacers. However, Bowers et al. [10] noted that the procedure carried a high rate of complications, which was separately reported by Kim et al. [11].

The aim of this study was to compare the clinical outcomes of interspinous spacer use to traditional decompressive surgery.

## Methods

### Search strategy

Electronic databases of Medline, Embase, Cochrane Library, and the Cochrane Controlled Trials Register were searched without restriction for publication date or language during August 2013. The following keywords were used, in combination with

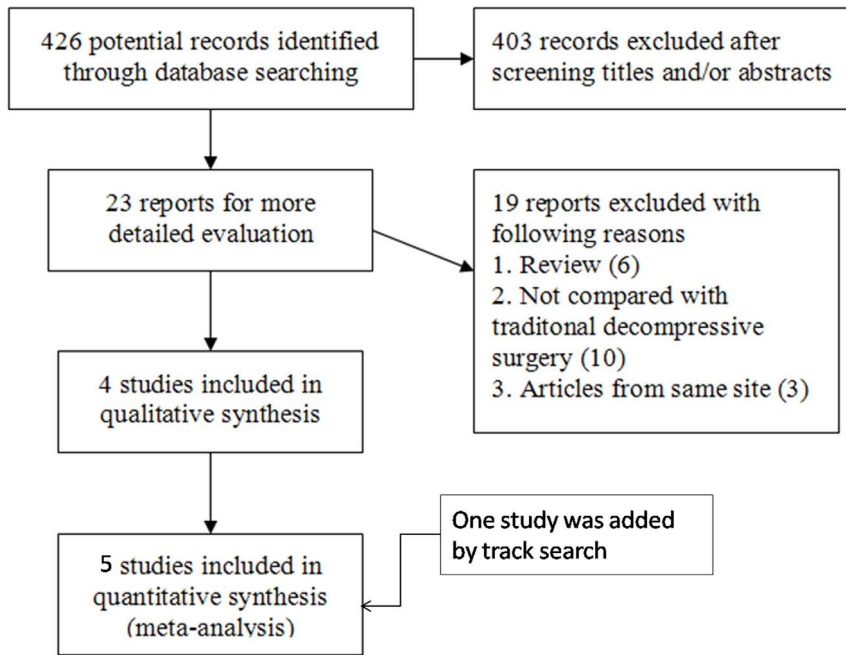

**Figure 1. Flowchart of the study selection process.**

doi:10.1371/journal.pone.0097142.g001

Boolean operators: “lumbar spinal stenosis,” “neurogenic intermittent claudication,” “interspinous spacer,” “X-stop,” “Coflex,” “DIAM,” “Wallis,” “Aperius,” and “decompressive surgery”. Related articles and reference lists were searched to avoid omissions. A track search was performed on February 27, 2014, to add any new publications.

### Eligibility criteria

A study was included in the analysis if it was: (1) a randomized controlled trial (RCT) or a non-randomized prospective comparative study, (2) comparing the clinical outcomes of interspinous spacer use versus traditional decompressive surgery, (3) in at least 30 patients, (4) with a follow-up period of at least 12 months. Two authors (AMW and YZ) assessed the potentially eligible studies independently. Any disagreement was discussed and resolved with a third independent author (LQL).

### Data extraction

Data were independently extracted by two investigators (XLW and YLJ) using a standardized form (**Table S1**). Collected data included the publication date, study design, sample size, follow-up duration, interventions, complications, incidence of reoperation, and clinical outcomes, including low back pain, leg pain, the Oswestry disability index (ODI), and the Roland disability questionnaire (RDQ).

### Risk of bias assessment

Risk of bias was assessed with the Downs and Black checklist [12]. The quality levels of randomized and non-randomized studies of healthcare interventions were assessed with 27 questions, as shown in **Table S2**.

### Statistical analysis

Meta-analyses were performed in the RevMan 5.2 software (Cochrane Collaboration, Software Update, Oxford, UK), ac-

**Table 1. Characteristics of the four included studies.**

| Characteristic     | Stromqvist 2013                                                  | Beyer 2013                                               | Richter 2012                            | Kim 2007                                         | Moojen 2013                                                        |
|--------------------|------------------------------------------------------------------|----------------------------------------------------------|-----------------------------------------|--------------------------------------------------|--------------------------------------------------------------------|
| Study design       | RCT                                                              | Non-RCT                                                  | Non-RCT                                 | Non-RCT                                          | RCT                                                                |
| Follow-up duration | 24 months                                                        | 24 months                                                | 24 months                               | 12 months                                        | 12 months                                                          |
| Participants       | 100 patients Age: 69 (49–89) years                               | 45 patients Age: 69.3±9.7 years                          | 62 patients Age: 68 (52–79) years       | 62 patients Age: 50 (20–81) years                | 159 patients Age: 63 (45–83) years                                 |
| Intervention       | IS = 50 TDS = 50 IS (X-Stop)                                     | IS = 12 TDS = 33 IS (Aperius)                            | IS = 31 TDS = 31 IS (Coflex)            | IS = 31 TDS = 31 IS (DIAM)                       | IS = 80 TDS = 79 IS (distraxion)                                   |
| Outcomes           | VAS of low back pain and leg pain, complications and reoperation | VAS of low back pain and leg pain, ODI and complications | ODI, RDQ, complications and reoperation | VAS of low back pain and leg pain, complications | VAS of low back pain and leg pain, RDQ, complications, reoperation |

**Note:** RCT: Randomized controlled trial; IS: Interspinous spacer group; TDS: Traditional decompressive surgery group; VAS: Visual analogue scale; ODI: Oswestry disability index; RDQ: Roland disability questionnaire.

doi:10.1371/journal.pone.0097142.t001

## A: VAS of lower back pain

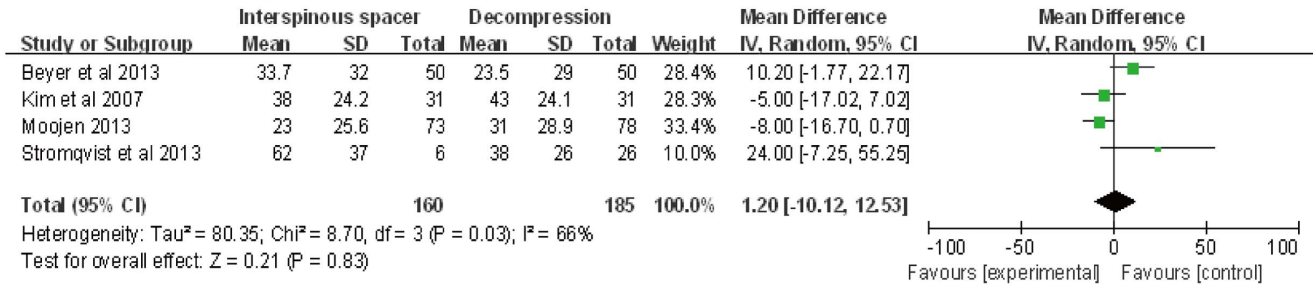

## B: VAS of leg pain

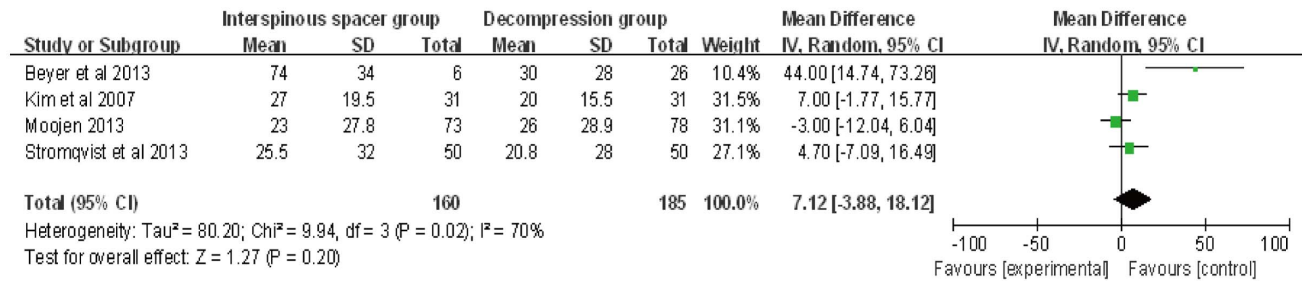

## C: Oswestry disability index (ODI)

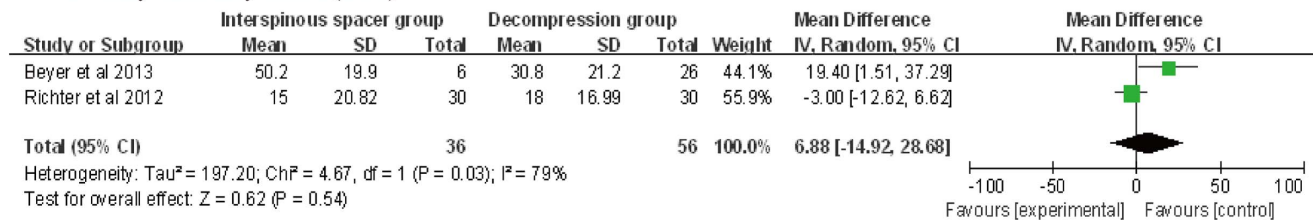

## D: Roland disability questionnaire (RDQ)

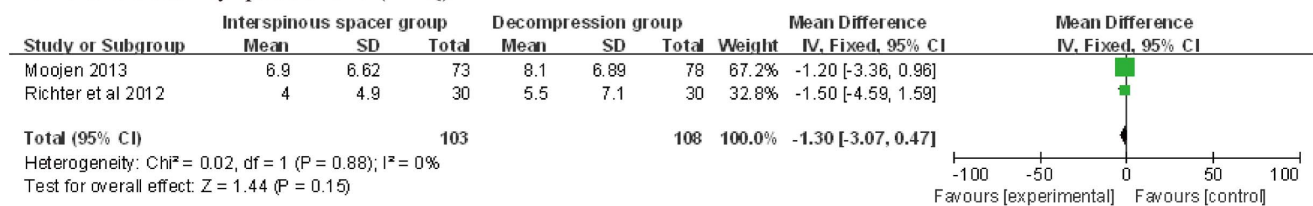

**Figure 2. Forest plot showing the meta-analysis of visual analogue scale (VAS) scores for low back pain (A) and leg pain (B), the Oswestry disability index (C), and the Roland disability questionnaire (D).**  
doi:10.1371/journal.pone.0097142.g002

cording to the recommendations of the Cochrane Collaboration. Another author independently checked the data before the analysis was performed. Risk ratios (RRs) were calculated for binary outcomes and weighted mean differences (WMDs) for continuous outcomes, along with the 95% confidence intervals (CIs). Heterogeneity was evaluated by chi-squared and I<sup>2</sup> tests. Acceptable heterogeneity was defined by a P-value of <0.01 for the chi-squared test and <30% for the I<sup>2</sup> test. A sensitivity analysis was performed, in which the possible effects of removing one study from the analysis were evaluated. Homogeneous data were pooled with a fixed-effects model. Heterogeneous data were assessed by a random-effects model.

## Results

### Studies included and risk of bias

The first search strategy identified 426 potential studies, of which 422 reports were excluded. One RCT [13] and three non-

randomized prospective studies [14,15,16] were included according to the eligibility criteria. Another RCT was included by the track search [17] (**Fig. 1**). In total, there were 208 patients in the interspinous spacer (IS) group and 217 patients in the traditional decompressive surgery (TDS) group. The characteristics of all five included studies are shown in **Table 1**. The risk of bias assessment according to the Downs and Black checklist of all included studies is shown in **Table S2**.

### Clinical outcomes

Four studies [13,14,16,17] reported visual analogue scale (VAS) scores for low back pain and leg pain. Pooled analysis showed no significant differences between the IS and TDS groups for low back pain (WMD: 1.20; 95% CI: -10.12, 12.53; P=0.03; I<sup>2</sup>=66%) or leg pain (WMD: 7.12; 95% CI: -3.88, 18.12; P=0.02; I<sup>2</sup>=70%; **Fig. 2A, B**). Two studies each reported the results of the ODI [15,16] and RDQ [15,17]. Pooled analysis shown no significant difference between the IS and TDS groups

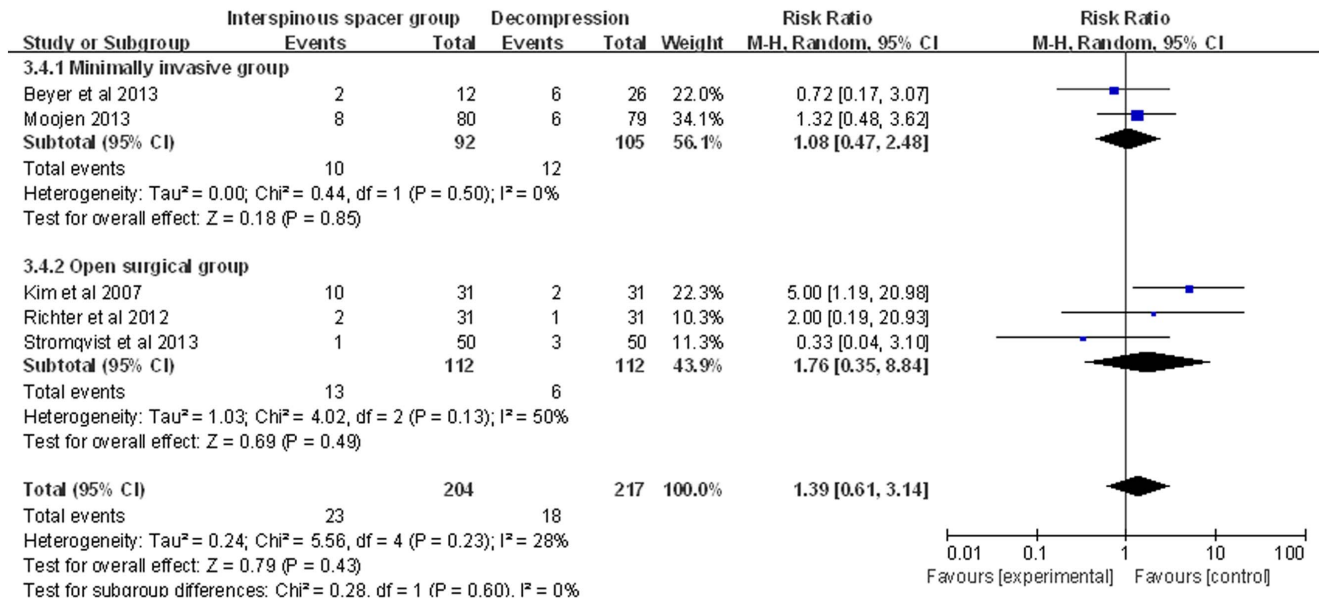

**Figure 3. Forest plot showing the meta-analysis for the incidence of complications.**  
doi:10.1371/journal.pone.0097142.g003

for the ODI (WMD: 6.88; 95% CI: -14.92, 28.68; P=0.03; I<sup>2</sup>=79%) or RDQ (WMD: -1.30; 95% CI: -3.07, 0.47; P=0.88; I<sup>2</sup>=0%; **Fig. 1C, D**).

**Complications**

All of the included studies reported the outcome of complications. There were 23/204 complications in the IS group and 18/217 complications in the TDS group. Pooled analysis showed no significant differences between the groups (RR: 1.39; 95% CI: 0.61, 3.14; P=0.23; I<sup>2</sup>=28%; **Fig. 3**). Analyses of the minimally invasive (MI) and open surgery (OS) subgroups revealed no significant differences between the IS and TDS groups (MI subgroup: RR: 1.08; 95% CI: 0.47, 2.48; OS subgroup: RR: 1.76; 95% CI: 0.35, 8.84; **Fig. 3**).

**Reoperation**

The incidence of reoperation was reported in three studies [13,15,17]. In the IS group, 31/161 cases required a second operation, compared to 11/160 cases in the TDS group. The incidence of reoperation was significantly lower in the TDS group (RR: 3.34; 95% CI: 1.77, 6.31; P=0.60; I<sup>2</sup>=0%, **Fig. 4**). Analyses of the MI and OS subgroups showed a higher incidence of reoperation in the IS group (MI subgroup: RR: 3.46; 95% CI: 1.47, 8.11; OS subgroup: RR: 3.20; 95% CI: 1.23, 8.33; **Fig. 4**).

**Discussion**

Patients with lumbar spinal stenosis can experience intermittent neurogenic claudication, pain, and numbness in the legs. Implantation of an interspinous spacer can increase the cross-

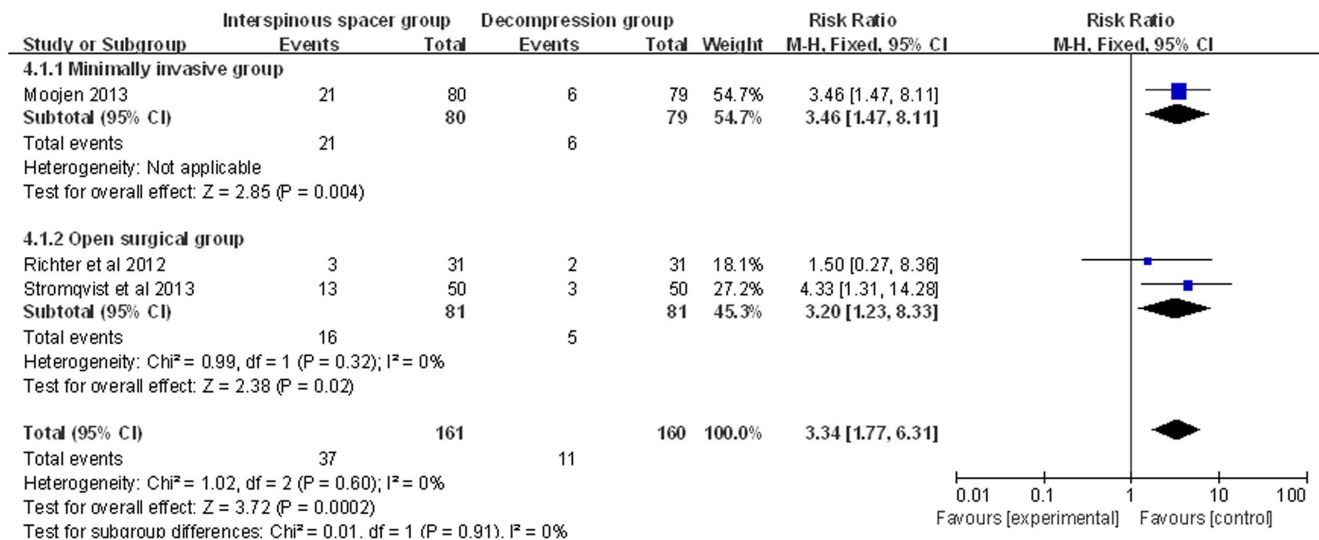

**Figure 4. Forest plot showing the meta-analysis for the reoperation rate.**  
doi:10.1371/journal.pone.0097142.g004

sectional area of the spinal canal [18]. Many interspinous spacers have been designed [19] for clinical use [20], and an increasing number of studies have reported their use for the treatment of degenerative lumbar spinal stenosis [4,5,21,22]. However, most of these studies were case series or clinical experiments without contrasting controls [23]. Our eligibility criteria permitted only five studies to be included in our meta-analysis. Although the included sample size was not large, it is larger than most other studies of dynamic device use for the management of lumbar spinal stenosis [24,25]. All of the included studies were prospective and comparatively designed, and two were RCTs [13]. Therefore, the results of our meta-analysis are credible.

The meta-analysis revealed no statistically significant differences in the clinical outcomes for back/leg pain, ODI, and RDQ between the two groups. Complication rates were also similar, although the incidence of complications in the TDS group (18/217; 8.3%) was slightly lower than that in the IS group (23/204; 11.3%). Interspinous spacer insertion has been associated with spinous process fracture, implant dislocation, [14,15], and heterotopic ossification [26,27], which may explain the slightly higher rate of complications in the IS group.

The reoperation rate was significantly higher in the IS group (37/161; 23.0%) compared to the TDS group (11/160, 6.9%). Moojen et al. [17] and Beyer et al. [16] implanted interspinous spacers through an MI method. Therefore, we performed a subgroup analysis of the incidence rates of complications and reoperations for the MI and OS subgroups. The subgroup analysis revealed the same results as the overall analysis, indicating that the higher reoperation rate was not related to the surgical method (MI or OS). Many surgeons choose indirect decompressive surgery [13] or simply insert the implant percutaneously [28,29]. It may be that patients could obtain benefits from the MI technique;

however, the cost of each interspinous process device is at least €2,000 (£1,704; \$2,756), as reported by Moojen et al. [17]. An alternative might be the use of microsurgical technique of simple decompression without interspinous spacer use, many of which have been reported.

A limitation of this meta-analysis was that only five studies were included. There is a lack of studies comparing interspinous spacer use and traditional decompressive surgery in the published literature. Based on the above meta-analysis of 12 to 24 months of clinical results, we conclude that patients may obtain some benefit from MI techniques with interspinous spacer use. However, the high cost and high reoperation rate associated with interspinous spacer use are worrisome. Therefore, the indications, risks, and benefits of using an interspinous process device should be carefully considered before surgery.

## Supporting Information

### Table S1 Data extraction form.

(DOCX)

### Table S2 Downs and Black Checklist.

(DOC)

### Checklist S1 PRISMA Checklist.

(DOC)

## Author Contributions

Conceived and designed the experiments: AMW XYW YLC. Performed the experiments: AMW YZ QLL. Analyzed the data: XLW YLJ PL. Contributed reagents/materials/analysis tools: AMW XYW YLC. Wrote the paper: AMW XYW.

## References

- Kovacs FM, Urrutia G, Alarcon JD (2011) Surgery versus conservative treatment for symptomatic lumbar spinal stenosis: a systematic review of randomized controlled trials. *Spine (Phila Pa 1976)* 36: E1335–1351.
- Slatis P, Malmivaara A, Heliövaara M, Sainio P, Hernö A, et al. (2011) Long-term results of surgery for lumbar spinal stenosis: a randomised controlled trial. *Eur Spine J* 20: 1174–1181.
- Siddiqui M, Smith FW, Wardlaw D (2007) One-year results of X Stop interspinous implant for the treatment of lumbar spinal stenosis. *Spine (Phila Pa 1976)* 32: 1345–1348.
- Sobotke R, Schluter-Brust K, Kaulhausen T, Rollinghoff M, Joswig B, et al. (2009) Interspinous implants (X Stop, Wallis, Diam) for the treatment of LSS: is there a correlation between radiological parameters and clinical outcome? *Eur Spine J* 18: 1494–1503.
- Park SC, Yoon SH, Hong YP, Kim KJ, Chung SK, et al. (2009) Minimum 2-year follow-up result of degenerative spinal stenosis treated with interspinous u (coflex). *J Korean Neurosurg Soc* 46: 292–299.
- Borg A, Nurboja B, Timothy J, Choi D (2012) Interspinous distractor devices for the management of lumbar spinal stenosis: a miracle cure for a common problem? *Br J Neurosurg* 26: 445–449.
- Alfieri A, Gazzeri R, Prell J, Scheller C, Rächinger J, et al. (2012) Role of lumbar interspinous distraction on the neural elements. *Neurosurg Rev* 35: 477–484; discussion 484.
- Richards JC, Majumdar S, Lindsey DP, Beaupre GS, Yerby SA (2005) The treatment mechanism of an interspinous process implant for lumbar neurogenic intermittent claudication. *Spine (Phila Pa 1976)* 30: 744–749.
- Zucherman JF, Hsu KY, Hartjen CA, Mehalic TF, Implicito DA, et al. (2005) A multicenter, prospective, randomized trial evaluating the X STOP interspinous process decompression system for the treatment of neurogenic intermittent claudication: two-year follow-up results. *Spine (Phila Pa 1976)* 30: 1351–1358.
- Bowers C, Amini A, Dailey AT, Schmidt MH (2010) Dynamic interspinous process stabilization: review of complications associated with the X-Stop device. *Neurosurg Focus* 28: E8.
- Kim DH, Tantorski M, Shaw J, Martha J, Li L, et al. (2011) Occult spinous process fractures associated with interspinous process spacers. *Spine (Phila Pa 1976)* 36: E1080–1085.
- Downs SH, Black N (1998) The feasibility of creating a checklist for the assessment of the methodological quality both of randomised and non-randomised studies of health care interventions. *J Epidemiol Community Health* 52: 377–384.
- Stromqvist BH, Berg S, Gerdhem P, Johnsson R, Moller A, et al. (2013) X-stop versus decompressive surgery for lumbar neurogenic intermittent claudication: randomized controlled trial with 2-year follow-up. *Spine (Phila Pa 1976)* 38: 1436–1442.
- Kim KA, McDonald M, Pik JH, Khoueir P, Wang MY (2007) Dynamic intraspinal spacer technology for posterior stabilization: case-control study on the safety, sagittal angulation, and pain outcome at 1-year follow-up evaluation. *Neurosurg Focus* 22: E7.
- Richter A, Halm HF, Hauck M, Quante M (2012) 2-year Follow-up After Decompressive Surgery With and Without Implantation of an Interspinous Device for Lumbar Spinal Stenosis: A Prospective Controlled Study. *J Spinal Disord Tech*.
- Beyer F, Yagdiran A, Neu P, Kaulhausen T, Eysel P, et al. (2013) Percutaneous interspinous spacer versus open decompression: a 2-year follow-up of clinical outcome and quality of life. *Eur Spine J* 22: 2015–2021.
- Moojen WA, Arts MP, Jacobs WC, van Zwet EW, van den Akker-van Marle ME, et al. (2013) Interspinous process device versus standard conventional surgical decompression for lumbar spinal stenosis: randomized controlled trial. *BMJ* 347: f6415.
- Siddiqui M, Nicol M, Karadimas E, Smith F, Wardlaw D (2005) The positional magnetic resonance imaging changes in the lumbar spine following insertion of a novel interspinous process distraction device. *Spine (Phila Pa 1976)* 30: 2677–2682.
- Wilke HJ, Drumm J, Haussler K, Mack C, Steudel WI, et al. (2008) Biomechanical effect of different lumbar interspinous implants on flexibility and intradiscal pressure. *Eur Spine J* 17: 1049–1056.
- Fabrizi AP, Maina R, Schiabello L (2011) Interspinous spacers in the treatment of degenerative lumbar spinal disease: our experience with DIAM and Aperius devices. *Eur Spine J* 20 Suppl 1: S20–26.
- Sur YJ, Kong CG, Park JB (2011) Survivorship analysis of 150 consecutive patients with DIAM implantation for surgery of lumbar spinal stenosis and disc herniation. *Eur Spine J* 20: 280–288.
- Nandakumar A, Clark NA, Smith FW, Wardlaw D (2013) Two-year results of X-stop interspinous implant for the treatment of lumbar spinal stenosis: a prospective study. *J Spinal Disord Tech* 26: 1–7.
- Ploumis A, Christodoulou P, Kapoutsis D, Gelalis I, Vraggalas V, et al. (2012) Surgical treatment of lumbar spinal stenosis with microdecompression and interspinous distraction device insertion. A case series. *J Orthop Surg Res* 7: 35.

24. Lee HS, Lee JH (2013) A comparison of dynamic views using plain radiographs and thin-section three-dimensional computed tomography in the evaluation of fusion after posterior lumbar interbody fusion surgery. *Spine J*.
25. Hobart J, Gilkes C, Adams W, Germon T (2013) Interspinous spacers for lumbar foraminal stenosis: formal trials are justified. *Eur Spine J* 22 Suppl 1: S47–53.
26. Tian NF, Wu AM, Wu LJ, Wu XL, Wu YS, et al. (2013) Incidence of heterotopic ossification after implantation of interspinous process devices. *Neurosurg Focus* 35: E3.
27. Xu C, Ni WF, Tian NF, Hu XQ, Li F, et al. (2013) Complications in degenerative lumbar disease treated with a dynamic interspinous spacer (Coflex). *Int Orthop* 37: 2199–2204.
28. Van Meirhaeghe J, Franssen P, Morelli D, Craig NJ, Godde G, et al. (2012) Clinical evaluation of the preliminary safety and effectiveness of a minimally invasive interspinous process device APERIUS(R) in degenerative lumbar spinal stenosis with symptomatic neurogenic intermittent claudication. *Eur Spine J* 21: 2565–2572.
29. Menchetti PP, Postacchini F, Bini W, Canero G (2011) Percutaneous surgical treatment in lumbar spinal stenosis with Aperius-PercLID: indications, surgical technique and results. *Acta Neurochir Suppl* 108: 183–186.
